# Supplementary material for: Carbon nanostructures as a scaffold for human embryonic stem cell differentiation toward photoreceptor precursors
Source: Royal Society of Chemistry journal article supplement (doi:10.1039/d0nr02256j), 2020-01-01
Supplement: d0nr02256j1.pdf [file d0nr02256j1.pdf]

Supplementary

## Carbon nanostructures as a scaffold for human embryonic stem cell differentiation toward photoreceptor precursors

Yoav Chemla,<sup>a,b</sup> Efrat Shawat Avraham,<sup>b,c</sup> Amos Markus,<sup>a</sup> Eti Teblum,<sup>b,c</sup> Aviad Slotky,<sup>a</sup> Yulia Kostikov,<sup>b,c</sup> Nairouz Farah,<sup>a</sup> Madina Telkhozhayeva,<sup>b,c</sup> Irit Shoval,<sup>b,c</sup> Gilbert Daniel Nessim,<sup>b,c</sup> and Yossi Mandel<sup>a,b,d</sup>.

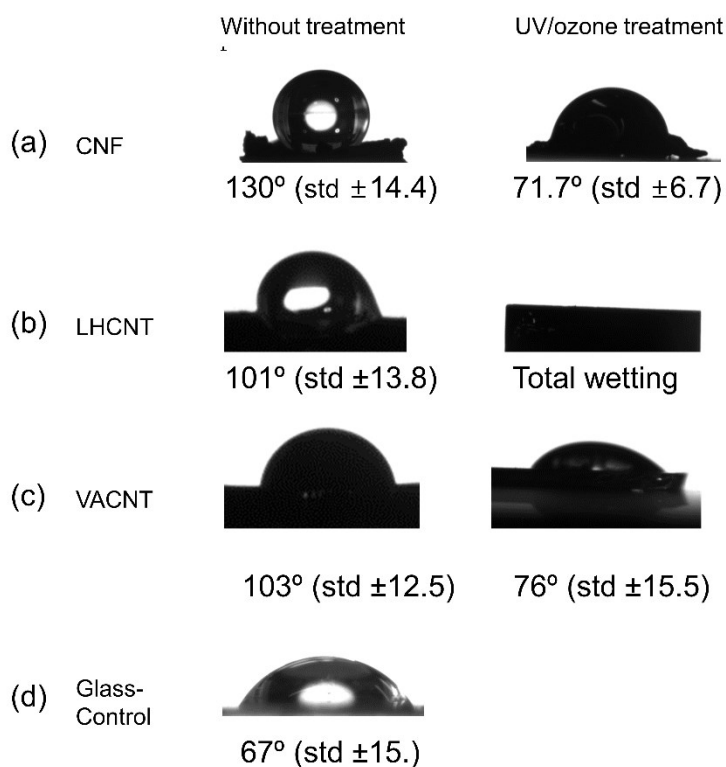

Fig sup 1. Nanostructures surface hydrophobicity decrease by UV/Ozone treatment. (a-d) contact angle of a droplet before and after UV/ozone treatment on CNF, HACNT, VACNT and Glass-(Control) surfaces, respectively. Following treatment of HACNT, the surface showed total wetting.

## Supplementary

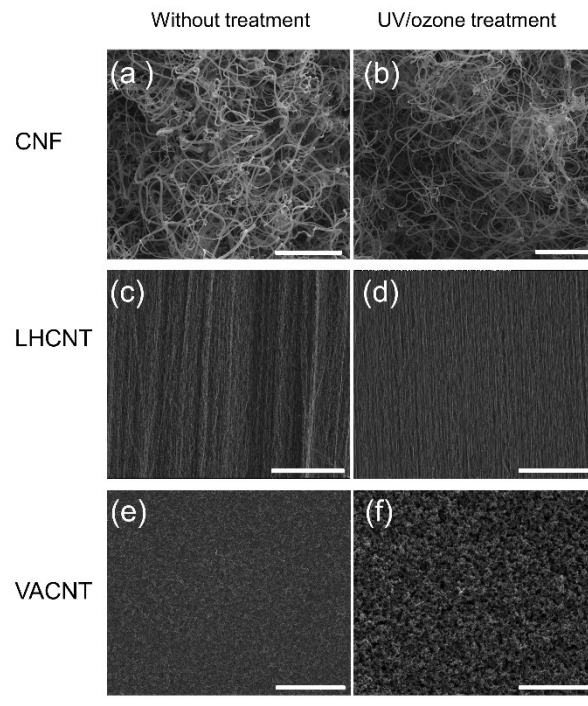

Fig sup 2. Effect of uv/OZONE treatment on CNT and CNF structure by SEM characterization. (a-b) SEM Images of carbon Nano fibers before and after UV/ Ozone treatment, respectively. (c-d ) SEM Images of carbon HACNT before and after UV/ Ozone treatment, respectively.(e-f) SEM Images of carbon VACNT before and after UV/ Ozone treatment, respectively. Scale bar, 4  $\mu\text{m}$ .

Supplementary

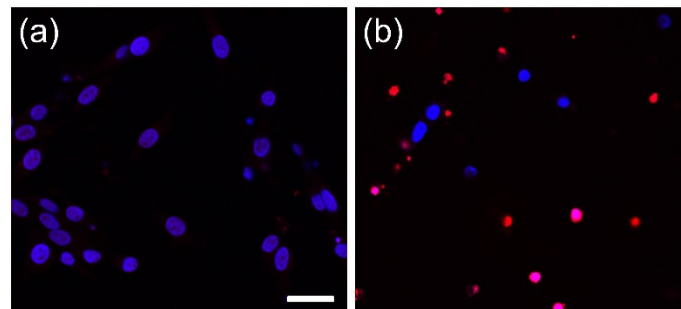

Figure 3. Validation of Brdu staining of apoptotic cells using ARPE cells treated with ethanol. (a) Confocal imaging of ARPE cells without ethanol treatment showing no Brdu staining (Control). (b) ARPE cells following ethanol treatment for 10 minute showing Brdu marker expressing. Scale bar 20  $\mu$ m.
